# Supplementary material
Source: PubMed Central journal article supplement (PMC5847082)
Supplement: jamaophthalmol-135-527-s001.pdf [file jamaophthalmol-135-527-s001.pdf]

1

2 **ADMINISTRATIVE INFORMATION**

3

4

5 **1. TITLE**

6 **Spectacle wearing amongst children randomized to ready-made spectacles**  
7 **or prescription spectacles, and cost savings to programmes**

8

9

10 **2. TRIAL REGISTRATION**

To be registered at Clinicaltrials.gov

11

12

13 **3. PROTOCOL VERSION**

1.0

14

15

16 **4. FUNDING**

Fondation L'Occitane - L'Occitane Sight Award  
Vision Impact Institute

17

18

19

20 **5a ROLES AND RESPONSIBILITIES**

21

22 **Chief Investigator:**

23 Professor Clare Gilbert MB ChB., MSc., MD  
24 Co-Director,  
25 Department of Clinical Research  
26 London School of Hygiene & Tropical Medicine  
27 Email: Clare.Gilbert@Lshtm.ac.uk

28

29 Overall responsibility for the trial, including input to study design, detailed methodology, designing data  
30 collection instruments, data management and analysis, interpretation and dissemination of the findings.

31

32 **Lead Investigator**

33 Priya Morjaria BSc (Hons) Optom, MCOptom, MSc  
34 Optometrist,  
35 Department of Clinical Research  
36 London School of Hygiene & Tropical Medicine  
37 Email: Priya.Morjaria@Lshtm.ac.uk

38

39 Contributed to the study design, detailed methodology, designing data collection instruments. Will  
40 undertake all the field work and collection of data, data entry, analysis interpretation and dissemination  
41 of the findings.

42

43 **Collaborators**

44 Dr Jennifer Evans,

45 Lecturer,  
46 Department of Clinical Research  
47 London School of Hygiene & Tropical Medicine  
48

49 Input to the study design, including sample size calculation, and support to statistical analysis and  
50 interpretation of the findings. Will contribute to dissemination of findings in peer-reviewed publications.  
51

52 Dr Muralikrishnan Kartha  
53 Centre for the Economics of Mental and Physical Health  
54 Institute of Psychiatry, Psychology & Neuroscience  
55 King's College London,  
56 Box 24, The David Goldberg Centre  
57 De Crespigny Park  
58 London SE5 8AF  
59

60 Input to the health economic component of the study including methodology, data collection and analysis  
61 and interpretation and dissemination of the findings.  
62

### 63 **Collaborating Institution**

64 Dr. Kaushik Murali and Miss Shalini Shashidharan  
65 Sankara Eye Care Institutions, Bangalore, India  
66

67 Input to the data collection in the field and the main collaborator in India. The team will provide logistical,  
68 managerial and technical support and coordinate with the education departments to obtain permission to  
69 conduct the trial.  
70

71 **5b Trial Sponsor** London School of Hygiene & Tropical Medicine.  
72

#### 73 Contact:

74 Patricia Henley,  
75 Quality / Governance Manager  
76 [patricia.henley@lshtm.ac.uk](mailto:patricia.henley@lshtm.ac.uk)  
77 Tel: 0207 927 2626  
78

### 79 **5c and d. Advisory Panel for the trial**

80  
81 An advisory panel will be established by April 2015, comprising a health economist, a statistician with  
82 expertise in clinical trials and an optometrist with research experience in low/middle income countries.  
83 The Advisory Panel will have oversight of all aspects of the trial, including study design, data collection  
84 instruments, implementation, and data management, analysis and interpretation.  
85

86 The Advisory Panel will recommend whether a Data Management Team is required.  
87  
88  
89

## 90 **6 INTRODUCTION**

### 91 **6a Background and rationale**

#### 92 **Problem statement**

93  
94  
95

96 Uncorrected refractive errors (uRE) are the commonest cause of visual loss in children. Myopia (short  
97 sightedness) is the commonest form, which usually starts around the age of 9 to 10, progressing in  
98 severity throughout adolescence. Hypermetropia (long sightedness) is more common in younger  
99 children, and usually resolves by around the age of 10 years. Astigmatism (distorted vision) affects all  
100 age groups and does not change over time. Myopia is far more common in Asian children, particularly in  
101 SE Asia, and all types of RE are less common in African children. Myopia is more common in urban  
102 children although the reasons are not completely understood. There is an increasing body of evidence  
103 that time spent outdoors is protective although the biological mechanisms are not clear (French, 2013;  
104 Sherwin, 2012). There is very little evidence of the impact of correcting RE in children on school  
105 performance, as this is very challenging to study, but correction does improve quality of life and visual  
106 functioning.

107  
108 Many countries have programmes for uRE, but approaches are not standardized and spectacle wearing  
109 rates can be very low, being higher with high uRE, and in girls (Sharma, 2012). Over-prescribing may  
110 also be a factor as protocols are rarely used. Other barriers include being teased, discomfort, no  
111 perceived benefit and beliefs about causation (Odedra, 2008). There have been three trials of  
112 interventions to improve spectacle wear: an education intervention of students in China, which had  
113 negative results, showing that educating children alone is not effective (Congdon, 2011). Another recent  
114 trial in China had a factorial design with six subgroups. Children in half the schools were randomised to a  
115 health education intervention, which involved children being shown a 10-minute documentary style video  
116 a booklet of cartoons, and classroom discussion led by teachers. The same schools were randomised to  
117 three approaches to providing spectacles i.e. free spectacles, a voucher, or children were given a  
118 prescription for spectacles. Spectacle wear was assessed by observation and self-report. Observed  
119 wear was higher in all four sub groups randomised to the health education intervention (RR 1.46 to 1.74)  
120 (Ma, 2014). The other trial was of free vs low cost spectacles in Tanzania, in which free spectacles  
121 almost doubled wearing rates (Wedner, 2008).

122  
123 Recent unpublished data from a study in Bangalore (undertaken by PM) on the impact of visual acuity  
124 screening cut-off and spectacle wearing rates also analysed the prescriptions of children followed-up  
125 unannounced at 3-4 months (84). The range of spherical equivalent in the better eye of those wearing  
126 their spectacles (n=18) was -1.75 to -9.00 D compared with -0.75 to -2.25 D in the group not wearing  
127 their spectacles (n=56).

128  
129 Study will be undertaken in India where children have a range of errors, including astigmatism.

### 130 131 **Relevance**

132 The health of school children is recognized by international health experts, policy makers, governments  
133 and international agencies as contributing to child development and learning, and hence to socio-  
134 economic development. This includes FRESH (Focus Resources on Effective School Health) whose  
135 partners include Education International; Partnership for Child Development; UNESCO; UNICEF; World  
136 Food Programme; WHO; World Bank.

137  
138 Results of this project will be of relevance to FRESH and local, national and international agencies that  
139 support school eye health and prevention of blindness in children globally.

### 140 141 **Main research question**

142 Amongst eligible schoolchildren aged 11 to 15 years, do low-cost, high-quality, ready-made spectacles  
143 result in comparable rates of spectacle wear at 3 to 4 months as more expensive custom-made  
144 spectacles, and what is the cost saving to programs?

145

146 One trial has been undertaken to assess the utility of ready-made spectacles (i.e. same prescription  
147 without astigmatic correction in both eyes) in China in which all children requiring spectacles were  
148 randomized to custom-made or ready-made spectacles regardless of their uRE (Zeng, 2009). This trial  
149 could not assess the proportion of children where ready-made spectacles would be suitable nor cost  
150 savings to programmes. In addition, studies undertaken in China cannot be extrapolated to other  
151 countries as in China most children have simple myopia (i.e. without astigmatism).  
152

## 153 **6b Choice of comparators and benefits and harms of each intervention**

154  
155 Prescribing according to the subjective prescription obtained following objective refraction by an  
156 optometrist is the gold standard means of correcting refractive errors. If the spectacles are well fitted i.e.  
157 so that the optical centre of each spectacle lens aligns with the optical axis of the eye, good visual acuity  
158 is anticipated without symptoms e.g., eye strain, or headaches. Spectacle frames are also chosen so  
159 that they fit the distance between the two eyes and the size of the head.

160  
161 In this trial children will only be eligible for randomisation to ready-made or custom-made spectacles if  
162 they have pre-defined low levels of astigmatism and/or anisometropia (i.e. a different prescription in right  
163 and left eyes). Prescribing ready-made spectacles may lead to a slight but clinically insignificant  
164 diminution in corrected visual acuity compared with that which could be obtained with custom-made  
165 spectacles. Children will also only be eligible for randomisation if the distance between the two eyes is  
166 compatible with the frame sizes available in ready-made spectacles. No discomfort is therefore  
167 anticipated in relation to the spectacle frames.  
168

169 The cosmetic appearance of spectacles is also of great importance. In both arms of the trial children will  
170 be able to select from a limited range of metal or plastic frames of different colours.  
171

172 From a programmatic perspective prescribing ready-made spectacles has benefits for providers as well  
173 as parents and children as a supply of ready-made spectacles with a wide range of prescriptions and  
174 frame types can be taken to the school and dispensed immediately. In contrast, custom-made  
175 spectacles have to be individually made up in optical laboratories, marked with the child's name, and the  
176 spectacles taken back to the school and given to the correct child.  
177

## 178 **7 OBJECTIVES**

### 179 **7a Main Hypothesis**

181 The proportion of children wearing spectacles 3 to 4 months after they were dispensed is similar  
182 amongst children randomised to ready-made spectacles compared with those randomised to custom-  
183 made spectacles.  
184

### 185 **7b Specific objectives**

- 186 1. To estimate the proportion of school children aged 11 to 15 years with refractive error that might  
187 benefit from ready-made spectacles
- 188 2. To compare the proportion of children wearing spectacles among those randomised to ready-made  
189 spectacles versus custom-made spectacles at unannounced visits at 3 to 4 months
- 190 3. To assess reasons for non-spectacle wear in both arms of the trial e.g. symptoms such as eyestrain  
191 or headache and other reasons
- 192 4. To assess the cost effectiveness of dispensing ready-made spectacles compared with custom-made  
193 spectacles, and cost savings to programs using ready-made spectacles  
194

## 195 **8 TRIAL DESIGN**

196

197 Randomized, non-inferiority, double masked clinical trial.

198

199 A non-inferiority design was chosen to compare ready-made spectacles with custom-made spectacles  
200 as the benefit of ready-made spectacles is the considerably lower cost and ease of dispensing which  
201 increases the efficiency of programs. As millions of children are affected by uncorrected refractive errors  
202 lower cost spectacles have the potential to increase coverage. Under these circumstances a slightly  
203 lower acceptance of spectacles, measured by spectacle wearing, might be acceptable. The non-  
204 inferiority margin of 10% was chosen to balance the considerations of efficacy and secondary benefits.

205

206 Allocation ratio approximately 1:1.

207

## 208 **METHODS: PARTICIPANTS, INTERVENTIONS AND OUTCOMES**

209

### 210 **9a Setting**

211

212 Government schools in urban and peri-urban areas surrounding Bangalore, Karnataka state, India.

213

214 A list of schools with pupils in the target age range will be obtained from the district education office.  
215 Information on the number of children aged 11-15 years will also be sought.

216

### 217 **10. Eligibility criteria**

218

#### 219 Inclusion criteria

220

221 • Age 11-15 years

222 • Presenting visual acuity (i.e. with spectacles if usually worn) of less than 6/9 in one or both eyes

223 • The visual acuity with full correction improves by two or more lines in the better seeing eye

224 AND

225 • the spherical equivalent (i.e. the sum of the myopic or hypermetropic prescription in dioptres (D) plus  
226 half the astigmatic cylindrical prescription) corrects the visual acuity to equal to, or not more than one  
227 line less than best corrected visual acuity with a full prescription in the better eye

228 AND

229 • the difference between the spherical equivalents of the right and left eyes is not >1 D

230 AND

231 • the inter-pupillary distance (IPD) matches that of ready-made spectacle frames available

232 AND

233 • the spectacle frame is of acceptable size and fit

234

235 A pilot study will be undertaken to estimate the proportion of children who fulfil these eligibility criteria  
236 which is estimated to be in the range of 30 to 50%.

237

#### 238 Exclusion criteria

239 • Children with other causes of visual loss

240 • Children whose visual acuity does not improve adequately with a spherical lens

241 • Children with more than 1 dioptre of anisometropia

242

243 All these children will be dispensed custom-made spectacles but will not be recruited to the trial.

244

#### 245 Eligibility of those performing interventions

246 All refractions, prescribing and dispensing will be undertaken by fully qualified optometrists, including the  
247 lead investigator.  
248  
249

250

## 251 INTERVENTIONS

252

253 11a. The intervention will be ready-made spectacles. The comparator will be custom-made spectacles  
254 (standard of care).

255

256 Although ready-made spectacles are available for bulk purchase, in this study all spectacles will be  
257 made up in Sankara Eye Hospital. This is so that a) all children will have the same choice of frames, and  
258 b) so that all spectacles will be delivered to the school at the same time. This will permit masking of  
259 students.

260

261 Ready-made spectacles have exactly the same prescription in each eye.

262

263 Custom-made spectacles are those made up by a dispensing optician on the basis of a prescription from  
264 a qualified optometrist. Each eye can have a different prescription, including astigmatic correction.

265

266 11b Modification of allocation

267 Not applicable

268

269 11c Strategies to improve adherence

270 Not applicable as spectacle wearing (i.e. adherence to the intervention) at 3 to 4 months is the primary  
271 outcome of the trial.

272

273 11d. Concomitant care

274 Any child identified with simple eye conditions such as conjunctivitis will be treated. Children identified  
275 with more serious problems such as strabismus or lens opacities will be referred.

276

## 277 OUTCOMES

278

### 279 12a. Primary outcome

280

281 The proportion of children in each arm of the trial who are wearing their spectacles at unannounced  
282 visits 3 to 4 months after refraction.

283

284 The trial has been powered to detect  $\leq 10\%$  difference in the proportion of children wearing ready-made  
285 spectacles compared with custom-made spectacles. This margin of non-inferiority has been selected as  
286 a recently published superiority trial was powered to detect a 10% or greater difference in spectacle  
287 wear between intervention arms (Congdon, 2011).

288

289 Categories 1 or 2 below will be defined as spectacle wearing, and categories 3 or 4 as non-spectacle  
290 wearing (Wedner, 2008):

291

- 292 1. Children were wearing the spectacles at the time of the unannounced visit
- 293 2. Children were not wearing the spectacles at the time of the visit but have them at school
- 294 3. Children were not wearing the spectacles at the time of the visit but said they were at home
- 295 4. Children said they no longer had the spectacles as they were broken or lost

296

### 296 12b. Other outcomes

297

298 Cost savings to the programme of dispensing ready-made spectacles. This analysis will only be  
299 undertaken should the trial demonstrate non-inferiority.  
300  
301 Reasons for non-spectacle wear.  
302  
303



304

### 305 **13 Participant timeline**

306

307 Eligible children will be identified in government schools in India over a 3 to 4 month period and  
308 spectacles will be dispensed within two weeks of refraction. Data on the primary outcome will be  
309 assessed at 3 to 4 months after refraction.

310

311 There will be no long-term follow-up.

312

### 313 **14 SAMPLE SIZE**

314 Data already obtained on uncorrected refractive errors from children aged 11-15 years in schools in the  
315 catchment area of this trial will be analyzed to determine the prevalence of significant uncorrected  
316 refractive error overall (see section 10 for the definition) and whether the prevalence differs between  
317 urban and peri-urban schools. Data from this earlier study will also be used to estimate of the proportion  
318 of children refracted who would be eligible for the trial.

319

320 The parameters used in the sample size calculation will include a significance level of 0.05, 95%  
321 confidence interval, 90% power and 1:1 allocation. The trial will be powered to detect a non-inferiority  
322 margin ( $\Delta$ ) of 10% or less. No increase will be required for loss to follow up as all eligible children  
323 present on the day of the visit will be recruited, and very few are likely to not take part. The communities  
324 are stable and few study children are expected to leave the school during the school year.

325

326 All calculations have been done using a one sided 95% confidence interval. The tool used to calculate  
327 sample size was Sealedenvelope (<https://www.sealedenvelope.com/power/binary-noninferior/>).

328

| Power | % wearing prescription spectacles at follow up | Inferiority margin | N in each arm | Total sample size |
|-------|------------------------------------------------|--------------------|---------------|-------------------|
| 80%   | 80%                                            | 10%                | 200           | 400               |
|       | 70%                                            | 10%                | 260           | 520               |
|       | 60%                                            | 10%                | 300           | 600               |
|       | 50%                                            | 10%                | 310           | 620               |

329

330 Once the number of children to be recruited to each arm of the trial is known, the total number of  
331 children to be screened can be calculated using the prevalence estimates from peri-urban and urban  
332 schools together with the proportion of children eligible for recruitment. As approximately 500 children  
333 will be examined in each school, the requisite number of schools in peri-urban and urban locations can  
334 then be determined.

335

336 For example, the prevalence of uncorrected refractive error in the earlier study in Bangalore was 4%. If  
337 one third are not eligible for ready-made spectacles the effective prevalence would be 2.7%. To obtain a  
338 sample of 260 eligible children, 10,000 children would need to be screened in 200 schools. The field  
339 team will comprise two trained field workers to measure visual acuity and two study, optometrists.  
340 Screening and assessing 500 children will take approximately 3 days (two schools per week).

341

### 342 **15. Recruitment**

343

344 After obtaining written permission from the Principal of each school the requisite number of classes  
345 representing the age range of children to be included will be selected, using simple random sampling, if  
346 required.

347  
348  
349  
350  
351  
352  
353  
354  
355  
356  
357  
358  
359  
360  
361  
362  
363  
364  
365  
366  
367  
368  
369  
370  
371  
372  
373  
374  
375  
376  
377  
378  
379  
380  
381  
382  
383  
384  
385  
386  
387  
388  
389  
390  
391  
392  
393  
394  
395  
396

All children in each selected class will have their presenting vision acuity measured at the 6/9 level in each eye separately. Those with a visual acuity of less than 6/9 in the better seeing eye, will be refracted by an experienced optometrist who will measure their best corrected visual acuity. Children will be recruited to the trial if they fulfil the eligibility criteria (see section 10). Children with significant refractive error who require custom-made spectacles to achieve the level of improvement in vision required for eligibility will not be recruited. They will be dispensed a pair of custom-made spectacles. All other children will be eligible for randomization.

## **METHODS: ASSIGNMENT OF INTERVENTIONS**

### **Allocation**

Individual children will be the unit of randomization.

In this study a proportion of children with uncorrected refractive errors in each school will not be eligible for randomization as they require custom-made spectacles. These spectacles will be delivered within two weeks of refraction. In order that head teachers and pupils are masked to the arm of the trial that each child has been randomized to, all randomized children will also have their spectacles dispensed at the same time as those who were not eligible i.e. within two weeks.

The field workers who follow up the children at 3 to 4 months to assess spectacle wearing will be masked to the arm of the trial the children were allocated to, as they will only be given a list of the school, the child's study ID number, name, class and gender. Data on the primary outcome will be entered into a separate database which will only be merged with the main database immediately prior to analysis.

All aspects of the study will be pilot tested in schools which will not be included in the main trial.

### **16a. Sequence generation.**

The allocation sequence (using block randomization) will be computer-generated by an independent statistician not involved in the fieldwork who will keep the list of the allocation codes. Randomization will be stratified by school.

### **16b. Allocation concealment mechanism**

#### During field work

Randomization codes will be placed in identical, sequentially numbered sealed envelopes, which will be taken to the school. The next envelope in this series will be opened for each eligible child and the sequential code number entered on the child's data collection form.

#### During data management

Details of the refractive error and what was prescribed will be recorded in each child's data recording form. From this information it will be possible to assess whether the child was randomized to custom-made spectacles. Concealment at this stage is, therefore, required.

Two databases will be created, and will only be merged once all the data have been entered and the data in database 1 has been cleaned.

397 Database 1: study ID, initials, date of birth, gender, age, school, randomization code, clinical details,  
398 including refractive error and details of the prescription dispensed.

399  
400 Database 2: study ID, initials, date of birth, gender, school, primary outcome

#### 401 402 **16c. Implementation**

403  
404 Experienced trained field workers will measure visual acuity, to identify children requiring refraction.  
405 Trained optometrists will identify children eligible for recruitment to the trial after standard refraction,  
406 measurement of corrected visual acuity testing, and assessment and comparison of the type and degree  
407 of refractive error in each eye.

408  
409 Another fieldworker will recruit eligible children and allocate them a unique study number. Immediately  
410 after recruitment each eligible child will be randomized.

#### 411 412 **17a. Masking**

413  
414 The following individuals will be masked to the allocation

- 415 • Children
- 416 • Head teachers
- 417 • Class teachers
- 418 • Field workers who deliver the spectacles to the school
- 419 • Field workers collecting primary outcome data

420  
421 The following individuals will be not masked to the allocation

- 422 • The optometrist who refracts the child and prescribes spectacles according to the randomization  
423 code

#### 424 425 **17b Unmasking**

426  
427 There are no circumstances under which unmasking is envisaged.

## 428 429 **METHODS: DATA COLLECTION, MANAGEMENT AND ANALYSIS**

### 430 431 **18a. Data collection methods**

432  
433 See appendices for flow chart and data collection instruments.

434  
435 In the schools selected for the trial trained field workers will measure visual acuity at the 6/9 level in each  
436 eye and with both eyes open, with spectacles if the child usually wears them. An illuminated LogMar  
437 cabinet with a LogMar chart will be used at the recommended test distance to overcome the limitation of  
438 variable illumination in the classrooms.

439  
440 All children who fail screening will undergo objective and subjective refraction by an optometrist. The  
441 following information will be recorded

- 442 - objective refraction and corrected visual acuity in each eye
- 443 - subjective refraction and record best corrected visual acuity in each eye
- 444 - the spherical equivalent will be calculated for each eye using the sum of the sphere plus half of any  
445 astigmatic correction (cylinder)

447 - visual acuity using the spherical equivalent will be measured and recorded for each eye

448

449 On the basis of these findings the optometrist will decide whether the child is eligible for the trial.

450

451 Children not eligible for the trial will be dispensed custom-made spectacles and the prescription will be  
452 recorded. Children will choose the spectacle frames they prefer from a selection of 6 to 7 frames

453

#### 454 Eligible children

455

456 Children in both arms of the trial will go through identical procedures regardless of their allocation.

457

458 A fieldworker will interview children to collect the following data: age, gender, class, and whether one or  
459 both parents wear spectacles for distance. Limited information will be collected on the educational level  
460 and occupation of their parents and on a limited number of assets, taken from National Household  
461 Survey questionnaires.

462

463 Children randomly allocated to custom-made spectacles will be dispensed custom-made spectacles and  
464 the prescription will be recorded. Children will choose the spectacle frames they prefer from a selection  
465 of 6 to 8 frames.

466

467 Children randomly allocated to ready-made spectacles will be dispensed ready-made spectacles using  
468 the spherical equivalent which gives the best corrected visual acuity in either eye. Children will choose  
469 the spectacle frames they prefer from a selection of 6 to 7 frames.

470

471 To ensure children receive the correct spectacles each pair of spectacles will be labelled with the child's  
472 name, age, school, class and study ID. This will be checked by two members of the project team. Each  
473 class teacher will be given a list of the names and study IDs of children in the trial. The teacher will  
474 ensure that the correct child was issued with the correct spectacles. A field worker will assess the visual  
475 acuity of each child given spectacles to ensure that they can see 6/9 with both eyes open.

476

#### 476 Primary outcome data

477

478 Trained field workers will visit each study school 3 to 4 months after the children were refracted. This will  
479 be an unannounced visit. Fieldworkers will ask permission from the head teacher to visit the classrooms  
480 of all children in the trial when they will ascertain spectacle wear according to the four categories  
481 indicated above.

482

#### 482 Other outcomes

483

484 Children in categories 3 and 4 will be asked an open ended question to explore why they were not  
485 wearing their spectacles. Children will be allowed to give more than one reason. Responses will be  
486 categorised as follows:

487

487 1. Never received them

488

488 2. Lost

489

489 3. Broken or scratched

490

490 4. Do not like wearing them – teased

491

491 5. Do not like wearing them – appearance

492

492 6. Do not like wearing them – headache or eyestrain

493

493 7. Parents do not like the child to wear them

494

494 8. Did not notice an improvement in vision i.e. no benefit

495

495 9. Other, specify

496

### 497 **18b Plans to complete follow up**

498  
499  
500  
501  
502  
503  
504  
505  
506  
507  
508  
509  
510  
511  
512  
513  
514  
515  
516  
517  
518  
519  
520  
521  
522  
523  
524  
525  
526  
527  
528  
529  
530  
531  
532  
533  
534  
535  
536  
537  
538  
539  
540  
541  
542  
543  
544  
545

If children are not present in the school on the day of the unannounced visit the school will be revisited on at least one further occasion.

Fieldwork will be planned such that the initial assessment, and follow-up 3 to 4 months later does not coincide with a long school holidays, nor the end of the school year when children may leave school. Refraction and follow-up will also avoid school examination periods.

#### Economic data collection

The cost per pair custom-made spectacles delivered to the school will be calculated using the cost of frames and lenses, salary time of dispensing optician staff to make up each pair of spectacles, and the cost of delivering the spectacles to individual children in school. The cost of ready-made spectacles will be obtained from local suppliers. Under non-trial conditions the ready-made spectacles would be dispensed at the time of refraction, and so the cost of delivering them will not be included.

### **19. DATA MANAGEMENT**

All field staff will undergo rigorous training for the trial, including inter-observer agreement studies for visual acuity measurement and refraction, and how to record data.

Two password protected databases will be created in Access, one for the primary outcome data and the other for all other data. Consistency and range checks will be built in. Data will be double entered by the lead investigator.

All data recording forms will be kept in a locked cupboard or filing cabinet in Sankara Eye Hospital.

### **20. STATISTICAL METHODS**

To assess the comparability of the two groups, the characteristics of children in the intervention and comparator arms will be compared i.e. age, gender, degree of uncorrected refractive error, presenting visual acuity in the better eye, peri-urban/urban school and whether they were previously wearing spectacles which required replacement,

#### **20a. Methods for analysing primary and secondary outcomes**

##### Primary outcome:

Analysis will be in the groups to which the children were randomly allocated. We expect all children will be given the spectacles that they are allocated. . The proportion of children wearing or having their spectacles with them at school at 3 to 4 months will be compared between the intervention and comparator arms using the risk ratio with 95% confidence intervals.

A separated analysis using logistic regression will also be undertaken to adjust for factors that may affect spectacle wearing such as gender, age, degree of refractive error in the better seeing\_eye, previously wore spectacles, and parental spectacle wear and education.

The randomization code will only be broken once the analysis is complete.

There will be no subgroup analysis.

##### Secondary outcomes

546 Analysis of cost saving to programmes of ready-made spectacles will only be undertaken if the clinical  
547 trial demonstrates non-inferiority.

548  
549 The unit cost of ready-made ( $Cost_{RM}$ ) and custom-made spectacles ( $Cost_{CM}$ ) will be calculated.

550  
551 The cost of dispensing spectacles to two groups of children in the study will be determined:

552  
553 A = not eligible for the trial and dispensed custom-made spectacles

554 B = eligible for randomization i.e. suitable for ready-made spectacles

555  
556 The cost to programmes without ready-made spectacles  $Cost^{CM\ only} = A*Cost_{RM} + B*Cost_{CM}$

557  
558 The cost to programmes with ready-made spectacles  $Cost^{RM\ used} = A*Cost_{CM} + B*Cost_{RM}$

559  
560 The cost saving to programs =  $Cost^{CM\ only} - Cost^{RM\ used}$

561  
562 Reasons for non-spectacle wear

563 Reasons for non-spectacle wear will be compared in children who were not wearing custom-made  
564 spectacles and ready-made spectacles, using z-tests.

## 565 **METHODS: MONITORING**

### 566 **21a and b Data monitoring**

567 A data monitoring committee will not be required.

568  
569 Both the intervention and comparator arms are not novel procedures and are in common use. There is  
570 no reason to expect significant adverse effects. Interim and subgroup analyses are not planned and  
571 there will be no stopping rules.

### 572 **22 Harms**

573  
574 Inaccurate prescribing or fitting of spectacles can give rise to blurred vision and/or symptoms of  
575 eyestrain or headache whilst wearing the spectacles. All refractions in this trial will be undertaken by  
576 highly experienced optometrists and so inaccurate prescribing is highly unlikely. In addition, children who  
577 have refractive errors not suitable for readymade spectacles will not be eligible for the trial, so reducing  
578 the risk of symptoms arising through under correction.

579  
580 Children will not be specifically asked whether they have these symptoms but will be offered the  
581 opportunity to say whether symptoms were the reason why they discontinued wearing spectacles at the  
582 time of the unannounced visit. Any child who says that blurred vision, eyestrain or headaches were why  
583 they did not wear their spectacles will be refracted again and given a new pair of spectacles, if required. .

584  
585  
586  
587

588 **ETHICS AND DISSEMINATION**

589  
590 **24 Research ethics approval**

591  
592 Ethical approval will be obtained from the Interventions Research Ethics Committee of LSHTM and the  
593 IRB of Sankara Eye Institute.

594

595 **25 Protocol amendments**

596  
597 Important protocol modifications, such as eligibility criteria, will be reported to the Interventions Research  
598 Ethics Committee of LSHTM and the IRB of Sankara Eye Institute.

599 **26a Consent**

600  
601 Approval will be sought from the relevant school authorities and school head teachers. Written informed  
602 consent will be sought from the parents. Parents of the children will be sent an information sheet  
603 regarding the study and explaining the study procedure along with the consent form prior to the  
604 screening.

605 Guidelines followed for school screening in India and by the collaborating institute state that before  
606 starting the screening at each school, the children are given verbal information and an explanation of the  
607 procedures by trained field workers. This gives the children an opportunity to ask any questions. At this  
608 stage, if the children are eligible for the trial, they will be given an assent form and health education on  
609 how to look after their spectacles and the health of their eyes.

610  
611 Written informed consent will be obtained from each school authority, head teacher and/or the school  
612 administrator to allow the school to participate in the study. All the information sheets and consent forms  
613 will be translated into local languages.

614 The lead collaborator in India will obtain written informed consent from school authorities and school  
615 head teachers.

616  
617

618 **27 Confidentiality**

619  
620 Data will be kept confidential and no identifiers will be entered into the databases. Data will be  
621 anonymised by allocating a unique study ID for each participant. The unique study ID and other  
622 identifiers will be used to merge the database with the primary outcome and the database at containing  
623 all the other data.

624  
625 Paper records will be stored in a locked filing cabinet at LSHTM and the data will only be made available  
626 to those involved in the study. The databases created will be password protected. At the end of the  
627 study, the data will be archived at LSHTM.

628

629 **28 Declaration of interests**

630  
631 None of the investigators have any competing interests.

632

633 **29 Access to data**

634  
635 Only investigators at LSHTM and the lead investigator at Sankara Eye Hospital will have access to the  
636 final trial dataset. A memorandum of understanding will be drawn up between the two institutions  
637 highlighting intellectual property issues, which will include data sharing and making the database  
638 available online.

639

640 **30. Ancillary and post-trial care**

641  
642 Not applicable.

643

644 **31a-c Dissemination policy**



645  
646  
647  
648  
649  
650  
651  
652

All investigators will contribute to the dissemination strategy which is likely to include a summary of the findings for head teachers, a report for the website of both institutions, publications in peer-reviewed journals, presentation at national (UK and India) and international conferences.

Recognized authorship eligibility guidelines will be followed. Professional writers will not be used.

653

654 **References**

- 655 Congdon N, Li L, Zhang M, Yang A, Gao Y, Griffiths S, Wu J, Sharma A, Lam DS. Randomized,  
656 controlled trial of an educational intervention to promote spectacle use in rural China: the see well to  
657 learn well study. *Ophthalmology*. 2011 Dec;118(12):2343-50. doi: 10.1016/j.ophtha.2011.06.016. Epub  
658 2011 Sep 1.
- 659 French AN<sup>1</sup>, Ashby RS, Morgan IG, Rose KA. Time outdoors and the prevention of myopia. *Exp Eye*  
660 *Res*. 2013 Sep;114:58-68. doi: 10.1016/j.exer.2013.04.018. Epub 2013 May 2.
- 661 Ma X, Zhou Z, Yi H, Pang X, Shi Y, Chen Q, Meltzer ME, le Cessie S, He M, Rozelle S, Liu Y, Congdon  
662 N. Effect of providing free glasses on children's educational outcomes in China: cluster randomized  
663 controlled trial. *BMJ*. 2014 Sep 23;349:g5740. doi: 10.1136/bmj.g5740.
- 664 Odedra N, Wedner SH, Shigongo ZS, Nyalali K, Gilbert C. Barriers to spectacle use in Tanzanian  
665 secondary school students. *Ophthalmic Epidemiol*. 2008 Nov-Dec;15(6):410-7. doi:  
666 10.1080/09286580802399094.
- 667 Sharma A, Congdon N, Patel M, Gilbert C. School-based approaches to the correction of refractive error  
668 in children. *Surv Ophthalmol*. 2012 May-Jun;57(3):272-83. doi: 10.1016/j.survophthal.2011.11.002. Epub  
669 2012 Mar 6. Review.
- 670 Sherwin JC<sup>1</sup>, Reacher MH, Keogh RH, Khawaja AP, Mackey DA, Foster PJ. The association between  
671 time spent outdoors and myopia in children and adolescents: a systematic review and meta-analysis.  
672 *Ophthalmology*. 2012 Oct;119(10):2141-51
- 673 Wedner S, Masanja H, Bowman R, Todd J, Bowman R, Gilbert C. Two strategies for correcting refractive  
674 errors in school students in Tanzania: randomised comparison, with implications for screening  
675 programmes. *Br J Ophthalmol*. 2008 Jan;92(1):19-24.
- 676 Zeng Y, Keay L, He M, Mai J, Munoz B, Brady C, Friedman DS. A randomized, clinical trial evaluating  
677 ready-made and custom spectacles delivered via a school-based screening program in  
678 China. *Ophthalmology*. 2009 Oct;116(10):1839-45. doi: 10.1016/j.ophtha.2009.04.004. Epub 2009 Jul 9.

679

680

681

682

684 APPENDIX 1. Flow chart

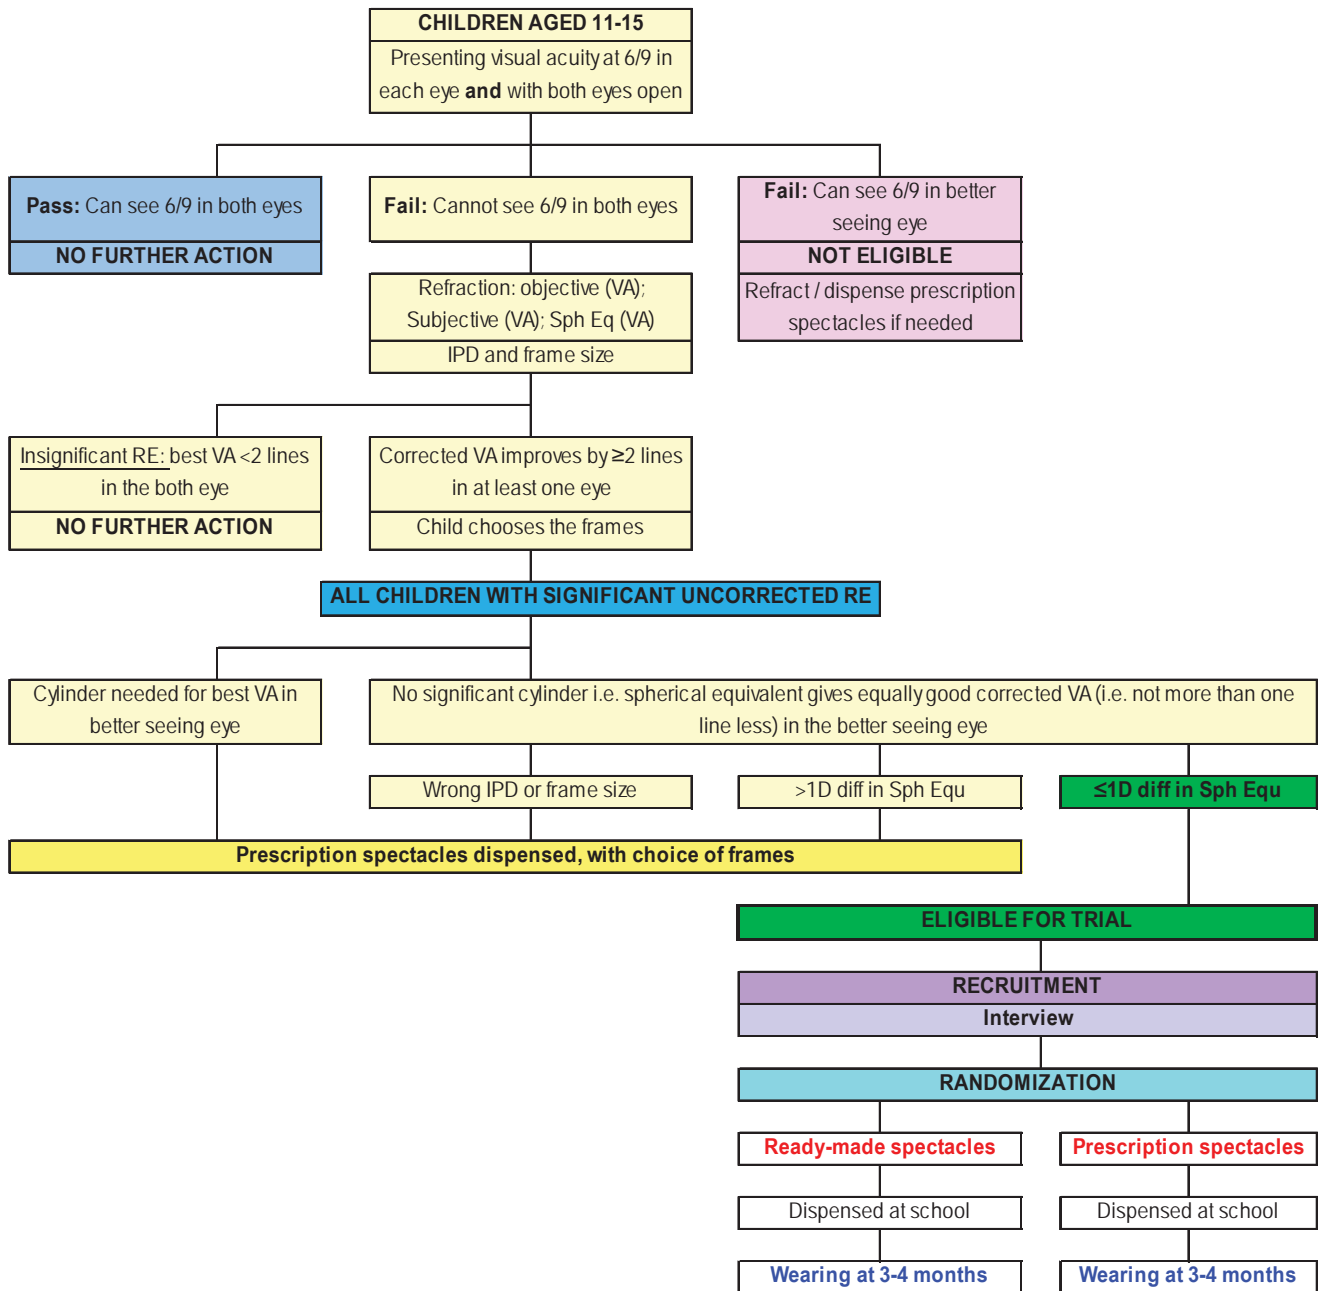

688

689 **APPENDIX 2 Timeline of activities**

690

| Project activities                          | Months of project |   |   |   |   |   |   |   |   |    |    |    |
|---------------------------------------------|-------------------|---|---|---|---|---|---|---|---|----|----|----|
|                                             | 1                 | 2 | 3 | 4 | 5 | 6 | 7 | 8 | 9 | 10 | 11 | 12 |
| <b>Preparatory:</b>                         |                   |   |   |   |   |   |   |   |   |    |    |    |
| Ethical approval (x2)                       |                   |   |   |   |   |   |   |   |   |    |    |    |
| MOUs being finalised                        |                   |   |   |   |   |   |   |   |   |    |    |    |
| Detailed planning                           |                   |   |   |   |   |   |   |   |   |    |    |    |
| Develop data collection instruments         |                   |   |   |   |   |   |   |   |   |    |    |    |
| <b>Field work in India:</b>                 |                   |   |   |   |   |   |   |   |   |    |    |    |
| Set up; train staff etc                     |                   |   |   |   |   |   |   |   |   |    |    |    |
| Pilot test data collection instruments      |                   |   |   |   |   |   |   |   |   |    |    |    |
| Baseline data collection                    |                   |   |   |   |   |   |   |   |   |    |    |    |
| <b>Follow up visit and data collection:</b> |                   |   |   |   |   |   |   |   |   |    |    |    |
| Assessment of spectacle wearing rates       |                   |   |   |   |   |   |   |   |   |    |    |    |
| <b>Analysis and writing up:</b>             |                   |   |   |   |   |   |   |   |   |    |    |    |
| Data entry                                  |                   |   |   |   |   |   |   |   |   |    |    |    |
| Data analysis                               |                   |   |   |   |   |   |   |   |   |    |    |    |
| Write up reports; publications              |                   |   |   |   |   |   |   |   |   |    |    |    |
| Dissemination meetings                      |                   |   |   |   |   |   |   |   |   |    |    |    |

691  
692  
693  
694  
695  
696  
697  
698  
699  
700  
701  
702  
703  
704  
705  
706  
707  
708  
709  
710  
711  
712

713

714 **APPENDIX 3 Data collection instruments**

**Spectacle wearing amongst children randomized to ready-made spectacles or prescription spectacles, and cost savings to programmes**

Recruitment form

Study number

   

Randomization Code

     

(If eligible)

1 Date            
Day Month Year

2 School name \_\_\_\_\_ 3 Level  Primary  
 Secondary

3 Location  Rural  
 Urban  
 Peri-urban

4 Name \_\_\_\_\_ 5 Class

6 Age   7 Gender  Male  
 Female

8 Presenting VA measured with own spectacles  
 Yes  
 No

9 Visual acuity (VA)  
 Can see 6/9 **Right eye**  Yes  No **Left eye**  Yes  No **Binocularly**  Yes  No

10 **Cannot see 6/9 in both eyes**  Yes May be eligible for the trial **Complete ALL except Q 16 and 17**  
**Can see 6/9 in one eye**  No NOT eligible for recruitment **Complete Q 11 to 17 ONLY**

**Refraction and visual acuity**

Presenting visual acuity

11 Smallest logMAR line seen (4 or more) **Right eye**   **Left eye**

12 *Objective*  +/-  +/-  
 Sphere   .   Sphere   .    
 Cyl  .   Cyl  .    
 Axis    Axis

13 Smallest logMAR line seen (4 or more)

14 *Subjective*  +/-  +/-  
 Sphere   .   Sphere   .    
 Cyl  .   Cyl  .    
 Axis    Axis

15 Smallest logMAR line seen (4 or more)

**For children NOT eligible for recruitment**

16 Spectacles required  Yes  
 No

17 Prescription needed  +/-  +/-  
 Sphere   .   Sphere   .    
 Cyl  .   Cyl  .    
 Axis    Axis

**For children NOT eligible for recruitment can now be discharged**

**All other children**

18 Spherical equivalent   .     .

19 Smallest logMAR line seen (4 or more)

with spherical equivalent

20 VA with SphE is equal to or not more than one line worse than best corrected VA

|   |     |
|---|-----|
| 1 | Yes |
| 0 | No  |

21 SphE is equal to or less than 1D difference between eyes

|   |     |
|---|-----|
| 1 | Yes |
| 0 | No  |

22 Interpupillary distance

|  |  |    |
|--|--|----|
|  |  | mm |
|--|--|----|

23 IPD between 60 and 64mm

|   |     |
|---|-----|
| 1 | Yes |
| 0 | No  |

24 Cylinder not greater than -0.75 in either eye

|   |     |
|---|-----|
| 1 | Yes |
| 0 | No  |

25 Yes to ALL 4 questions above

|   |     |                                                                   |
|---|-----|-------------------------------------------------------------------|
| 1 | Yes | <i>Eligible for recruitment</i>                                   |
| 0 | No  | <i>NOT eligible. Prescribe spectacles if needed and discharge</i> |

**Ask the child the following questions**

26 What job does you father / mother have

| Father |                 | Mother |                 |
|--------|-----------------|--------|-----------------|
| 1      | Professional    | 1      | Professional    |
| 2      | Clerk           | 2      | Clerk           |
| 3      | Service / Sales | 3      | Service / Sales |
| 4      | Craft trade     | 4      | Craft trade     |
| 5      | Skilled worker  | 5      | Skilled worker  |
| 6      | Labourer        | 6      | Labourer        |
| 7      | Unemployed      | 7      | Unemployed      |
| 8      | Other           | 8      | Other           |

27 Do your mother and/or father own a mobile phone?

|   |             |
|---|-------------|
| 0 | Neither     |
| 1 | Father only |
| 2 | Mother only |
| 3 | Both        |

28 Do your mother and/or father wear spectacles for walking around?

|   |             |
|---|-------------|
| 0 | Neither     |
| 1 | Father only |
| 2 | Mother only |
| 3 | Both        |

29 Do you have any of the following in your house?

| Yes | No |          |
|-----|----|----------|
| 1   | 0  | Radio    |
| 1   | 0  | TV       |
| 1   | 0  | Computer |
| 1   | 0  | Bicycle  |
| 1   | 0  | Car      |

30 Can your father read and write easily

|   |                |
|---|----------------|
| 1 | Yes            |
| 0 | No             |
| 9 | Not applicable |

31 Can your mother read and write easily

|   |                |
|---|----------------|
| 1 | Yes            |
| 0 | No             |
| 9 | Not applicable |

32 Randomization code

|                      |                      |                      |                      |                      |
|----------------------|----------------------|----------------------|----------------------|----------------------|
| <input type="text"/> |
| <i>School code</i>   |                      | <i>Child code</i>    |                      |                      |

33 Randomized to

|   |              |
|---|--------------|
| 1 | Ready-made   |
| 2 | Prescription |

34 If randomized to ready-mades

Right and left eyes  
 .  D

35 If randomized to prescription glasses, prescription needed

|        |                                                                                       |        |                                                                                       |
|--------|---------------------------------------------------------------------------------------|--------|---------------------------------------------------------------------------------------|
| +/-    | <input type="text"/>                                                                  | +/-    | <input type="text"/>                                                                  |
| Sphere | <input type="text"/> <input type="text"/> . <input type="text"/> <input type="text"/> | Sphere | <input type="text"/> <input type="text"/> . <input type="text"/> <input type="text"/> |
| Cyl    | <input type="text"/> . <input type="text"/> <input type="text"/>                      | Cyl    | <input type="text"/> . <input type="text"/> <input type="text"/>                      |
| Axis   | <input type="text"/> <input type="text"/> <input type="text"/>                        | Axis   | <input type="text"/> <input type="text"/> <input type="text"/>                        |

36 Date spectacles given

|                      |                      |                      |                      |             |   |                      |                      |
|----------------------|----------------------|----------------------|----------------------|-------------|---|----------------------|----------------------|
| <input type="text"/> | <input type="text"/> | <input type="text"/> | <input type="text"/> | 2           | 0 | <input type="text"/> | <input type="text"/> |
| <i>Day</i>           |                      | <i>Month</i>         |                      | <i>Year</i> |   |                      |                      |

Refraction done by

\_\_\_\_\_





## Spectacle wearing amongst children randomized to ready-made spectacles or prescription spectacles, and cost savings to programmes

### Follow-up of students

Study number

|  |  |  |
|--|--|--|
|  |  |  |
|--|--|--|

Randomization Code

|  |  |  |  |  |
|--|--|--|--|--|
|  |  |  |  |  |
|--|--|--|--|--|

1 Date

|            |  |              |  |             |  |  |  |
|------------|--|--------------|--|-------------|--|--|--|
|            |  |              |  |             |  |  |  |
| <i>Day</i> |  | <i>Month</i> |  | <i>Year</i> |  |  |  |

2 School name

---

3 Level

|   |           |
|---|-----------|
| 1 | Primary   |
| 2 | Secondary |

4 Location

|   |            |
|---|------------|
| 1 | Rural      |
| 2 | Urban      |
| 3 | Peri-urban |

5 Name

---

6 Class

|  |  |
|--|--|
|  |  |
|--|--|

7 Age

|  |  |
|--|--|
|  |  |
|--|--|

8 Gender

|   |        |
|---|--------|
| 1 | Male   |
| 2 | Female |

9 Date spectacles given

|            |  |              |  |             |  |  |  |
|------------|--|--------------|--|-------------|--|--|--|
|            |  |              |  |             |  |  |  |
| <i>Day</i> |  | <i>Month</i> |  | <i>Year</i> |  |  |  |

10 Date of follow-up visit

|            |  |              |  |             |  |  |  |
|------------|--|--------------|--|-------------|--|--|--|
|            |  |              |  |             |  |  |  |
| <i>Day</i> |  | <i>Month</i> |  | <i>Year</i> |  |  |  |

11 Child at school

|   |     |
|---|-----|
| 1 | Yes |
| 2 | No  |

12 Spectacle wear status

|   |                                                      |
|---|------------------------------------------------------|
| 1 | Wearing at time of visit                             |
| 2 | Not wearing at time of visit but have them at school |
| 3 | Not wearing at time of visit but have them at home   |
| 4 | No longer have spectacles as they are broken or lost |

*Go to Q13*

*Go to Q13*

13 Reasons for non-wear

| First reason | Second reason (if more than one mentioned) |
|--------------|--------------------------------------------|
| 1            | 1                                          |
| 2            | 2                                          |
| 3            | 3                                          |
| 4            | 4                                          |
| 5            | 5                                          |
| 6            | 6                                          |
| 7            | 7                                          |
| 8            | 8                                          |
| 9            | 9                                          |

- 1 Never received them
- 2 Spectacles broken or scratched
- 3 Spectacles lost
- 4 Do not like wearing them - teased
- 5 Do not like wearing them - appearance
- 6 Do not like wearing them - headache or eyestrain
- 7 Parents do not like child to wear them
- 8 Did not notice an improvement in vision i.e. no benefit
- 9 Other, specify \_\_\_\_\_

Name of field worker

---

|  |
|--|
|  |
|--|

720

721

722

723

724

**APPENDIX 3 Summary Budget**

|                   |                                                                     |                   |
|-------------------|---------------------------------------------------------------------|-------------------|
| <b>Personnel</b>  | <u>UK salaries:</u>                                                 |                   |
|                   | Priya Morjaria full time 4 months                                   | £10,000.00        |
|                   | Priya Morjaria 50% time 4 months                                    | £6,250.00         |
|                   | Grant Administration                                                | £1,000.00         |
|                   | <u>India salaries</u>                                               |                   |
|                   | Optometrist                                                         | £900.00           |
|                   | Research Assistants                                                 | £500.00           |
|                   |                                                                     |                   |
| <b>Equipment:</b> | Logmar Charts x2                                                    | £304.00           |
|                   | Computer x1                                                         | £750.00           |
|                   | Equipment for refraction is available                               | £0.00             |
|                   |                                                                     |                   |
| <b>Travel:</b>    | Return flights to India x2                                          | £1,800.00         |
|                   | Accommodation & subsistence in India for 12 weeks                   | £2,000.00         |
|                   | Local travel in India to schools                                    | £1,500.00         |
|                   |                                                                     |                   |
| <b>Other:</b>     | Presbyopic for Teachers x100                                        | £150.00           |
|                   | Ready-made specs x240                                               | £480.00           |
|                   | Prescription Specs x240                                             | £1,920.00         |
|                   | Printing data recording forms                                       | £250.00           |
|                   | Tetracycline eye ointment                                           | £20.00            |
|                   | Letters to parents; mobile phone credit for SMS messages            | £250.00           |
|                   | ICEH Office costs and administration                                | £500.00           |
|                   | Information sheets for teachers about glaucoma/DR                   |                   |
|                   | Information sheets for teachers about refractive errors in children |                   |
|                   | Dissemination of findings: publication and conferences              |                   |
|                   |                                                                     |                   |
| <b>Subtotal</b>   |                                                                     | <b>£28,574.00</b> |
|                   |                                                                     |                   |
|                   | Indirect costs for LSHTM @20% of UK salary                          | £3,450.00         |
|                   |                                                                     |                   |
|                   | <b>TOTAL</b>                                                        | <b>£32,024.00</b> |

725

726

727 **APPENDIX 4 Information sheets and consent forms**

728

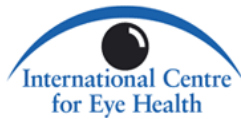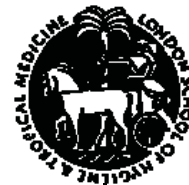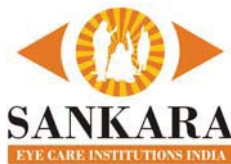

729

730

**Information sheet for head teachers**

731

732 **Project:** **A comparison of two different types of spectacles for children with refractive errors**

733

734 **Institution:** London School of Hygiene and Tropical Medicine  
735 Keppel Street  
736 London, WC1E 7HT, UK

737

738 **Researchers:** Miss. Priya Morjaria  
739 [priya.morjaria@lshtm.ac.uk](mailto:priya.morjaria@lshtm.ac.uk)  
740 [Tel: +44 7732055398](tel:+447732055398)

741

742 Shalini Shashidharan  
743 [blr.nannakannu@sankaraeye.com](mailto:blr.nannakannu@sankaraeye.com)  
744 Sankara Eye Care Institutes, Bangalore  
745 Tel: +91 97 39 777726

746 We would like to involve several of the students in your school to participate in a research project. Before you decide  
747 whether they should participate, it is important you understand what the research is about. Kindly please read  
748 through the information below carefully. I will be happy to discuss any questions that you may have. If you decide  
749 that the pupils in your school can participate in the study, please sign the informed consent form attached to this  
750 sheet.

---

751

**What is the purpose of this study?**

753 To compare two different types of high quality spectacles for children aged 11 to 15 years who are visually impaired  
754 from uncorrected refractive errors (long sightedness, shortsightedness, or astigmatism). Both types of spectacles will  
755 be provided by the project. The results will be used to improve the efficiency and reputation of school screening  
756 programs.

757

**Why was this school chosen?**

758

759 We are inviting certain schools to take part in this study which have students aged between 11-15 years. We have  
760 chosen this age group as refractive errors are more common at this age than in younger children. In this study we  
761 want to compare children from rural areas with children from peri-urban areas who attend government schools. Your  
762 school has been selected at random from a list of schools provided by the local authorities.

### 763 **What is involved in the study?**

764 All children will be screened using a vision testing chart on a mobile phone. Children who fail the screening test will  
765 then be examined in detail by a fully qualified optometrist who will decide which type of spectacles each child is  
766 eligible for. Children with uncomplicated refractive errors will be randomly allocated to high-quality, ready-made  
767 spectacles (i.e. spectacles that do not need to be made up by an optician) or spectacles that do need to be made up  
768 by an optician. Both groups of children will be able to select the spectacle frames they prefer. All children needing  
769 spectacles will be given a letter to take home to their parents to explain that their child needs spectacles. The letter  
770 will also explain the study in simple language (see below). All children needing glasses will receive them free of  
771 charge from the project 2 to 3 weeks after our initial visit, as the glasses need to be made up in Sankara Eye Hospital  
772 in Bangalore. After 3 to 4 months a member of the research team will come back to the school to follow up on the  
773 children who were given both types of spectacles. The researchers will ask them a few simple questions.

774  
775 In each school we plan to examine approximately 500 children, which may mean randomly selecting classes. We are  
776 very aware that this can be disruptive to teachers as well as children. If you agree that children in your school can  
777 take part we will discuss with you when might be the best time for the research team to come to the school. We  
778 anticipate being in the school for no more than 3 to 4 days.

779  
780 None of the procedures that will be used in the study will cause any distress or harm to the pupils as the research  
781 team will be using standard methods and all children will be given high quality spectacles.

782  
783 We are also aware that teachers may have eye problems that they are either not aware of or which have not been  
784 treated. We will ask all the teachers in the school if they would like to have their vision tested and their eyes  
785 examined. For some teachers we may need to instill eye drops so as to obtain a better view of the retina. This can  
786 lead to blurring of vision for a few hours. We will administer an information sheet and consent form like this one to  
787 each individual teacher to ensure we have their consent to participate. However, this too might be very disruptive,  
788 and if you are willing for teachers in your school to be involved, we will discuss with you what the best timing might  
789 be. Any teacher found to have a problem will be referred to a specialist eye department or hospital. All teachers  
790 needing reading spectacles will be given a pair.

791  
792 Findings from this part of the study are also important as clear vision is essential for teachers.

### 793 **Does the school have to take part?**

794 No, this is entirely your own decision. The school is under no obligation to be a part of this study and can withdraw  
795 from it at any time without giving any reason.

### 797 **Confidentiality of data**

798 All the information we collect will be recorded on paper records, which will be kept in locked filing cabinets in Sankara  
799 eye hospital initially and then at the London School of Hygiene and Tropical Medicine in London. Data will be entered  
800 into the database in a computer which will be password protected. No-one other than the researchers will have  
801 access to this data, and no names will be used in analysis. We will also give each participating school a code so that  
802 individual schools cannot be identified in any reports.

### 803 **How the findings will be used**

804 At the end of the study we will write a report which will be sent to all teachers in participating schools. If you have any  
805 questions or concerns about the findings we would be happy to discuss them with you. We also plan to present the  
806 findings at meetings and conferences, and to write them up for publication.

807

808 **Thank you very much for your attention today.**

809

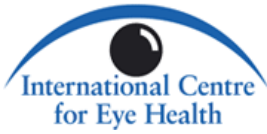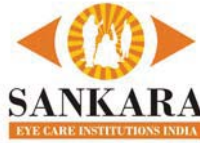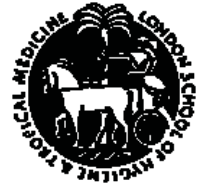

811

812

**Consent sheet for head teachers**

813

**Project:** A comparison of two different types of spectacles for children with refractive errors

814

**Institution:** London School of Hygiene and Tropical Medicine

815

Keppel Street

816

London, WC1E 7HT, UK

817

818

**Researchers:** Miss. Priya Morjaria

819

[priya.morjaria@lshtm.ac.uk](mailto:priya.morjaria@lshtm.ac.uk)

820

[Tel: +44 7732055398](tel:+447732055398)

821

822

Shalini Shashidharan

823

[blr.nannakannu@sankaraeye.com](mailto:blr.nannakannu@sankaraeye.com)

824

Sankara Eye Care Institutes, Bangalore

825

Tel: +91 97 39 777726

826

827

To confirm that you would like the students in the school to participate in this study, you must sign this form.

828

829

By signing this form, I am confirming the following:-

I have read the patient information sheet and understand what is required of the students

Yes

No

All my questions have been answered and clarified to my satisfaction.

I agree that students in this school can participate in this study and will provide the necessary information required from me.

I am agree that teachers wishing to take part in this study are free to do so if this is what they wish.

830

831

\_\_\_\_\_  
Headteacher's name (in block capitals)

832

\_\_\_\_\_  
Signature of Head teacher

\_\_\_\_\_  
Date (dd/mm/yy)

833

834

835



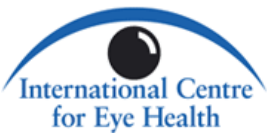

Name of researcher(in block capitals)  
Date (dd/mm/yy)

Signature of researcher

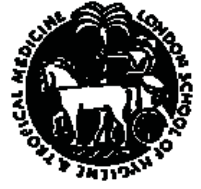

840

841

Name of witness (in block capitals)

Signature of witness

Date (dd/mm/yy)

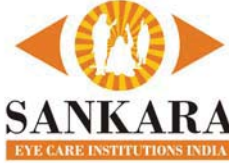

842

843

844

**Information sheet for parents**

845

846

**From**

Shalini Shashidharan  
Co-ordinator  
Sankara Eye Hospital  
Bangalore  
[blr.nannakannu@sankaraeye.com](mailto:blr.nannakannu@sankaraeye.com)  
Tel: +91 97 39 777726

847

848

849

850

851

852

**And**

Miss Priya Morjaria  
London School of Hygiene and Tropical Medicine, London  
[priya.morjaria@lshtm.ac.uk](mailto:priya.morjaria@lshtm.ac.uk)

853

854

855

856

857

Dear Parent,

858

859

860

861

862

863

864

865

866

867

868

869

870

871

872

873

874

The head teacher at {.....} school has given permission for some of the students to take part in a study of children's vision. We are writing to you to let you know that the vision of your child was recently tested and your child was found to benefit from spectacles.

The study is being run by eye specialists in Sankara eye hospital in Bangalore and they have agreed that all children who need spectacles will be given a pair of high quality spectacles free of charge. These spectacles will be delivered to the school in 7 to 10 days time.

Most children who need spectacles have slightly blurred vision, which may make it difficult for them to see detail such as writing on the blackboard. In other respects the eyes are entirely healthy.

If you would like further information about your child's vision for the study please contact Shalini Shashidharan at Sankara eye hospital.
